# Supplementary material
Source: Springer Nature journal article supplement (https://www.springermedizin.de/resource/supplementary/12876_2010_575_MOESM1_ESM.pdf/9437286)
Supplement: MOESM1 [file 9437286]

174 relevant abstracts for assessment

50 studies excluded: (<1990, non colonoscopy, non RCTs ; and foreign language)

124 randomized controlled trials for full text review

53 studies excluded: (pediatrics, non PEG or non- NaP, studies with no categorical data and studies using nontraditional dosing)

71 studies included for final analysis
